# Supplementary material
Source: ML conference proceedings conference paper supplement (https://aclanthology.org/2020.acl-demos.23)
Supplement: Dataset [file 2020.acl-demos.23.Dataset.pdf]

# Nakdan: Professional Hebrew Diacritizer

Avi Shmidman<sup>1</sup>

Shaltiel Shmidman<sup>1</sup>

Moshe Koppel<sup>1</sup>

Yoav Goldberg<sup>1,2</sup>

<sup>1</sup>Bar Ilan University / Ramat Gan, Israel  
DICTA / Jerusalem, Israel

<sup>2</sup>Allen Institute for Artificial Intelligence

avi.shmidman@biu.ac.il, {shmidms1,koppel,yogo}@cs.biu.ac.il

## Abstract

We present a system for automatic diacritization of Hebrew text. The system combines modern neural models with carefully curated declarative linguistic knowledge and comprehensive manually constructed tables and dictionaries. Besides providing state of the art diacritization accuracy, the system also supports an interface for manual editing and correction of the automatic output, and has several features which make it particularly useful for preparation of scientific editions of Hebrew texts. The system supports Modern Hebrew, Rabbinic Hebrew and Poetic Hebrew. The system is freely accessible for all use at <http://nakdanpro.dicta.org.il>.

## 1 Introduction

We present a web-based system for diacritization of Hebrew text, which caters to both casual and expert users. The diacritization engine driving the system combines manually curated linguistic resources with modern machine learning models.

**Diacritization** In Hebrew writing, the letters are almost entirely consonantal; the vowels are indicated by diacritic marks, generally positioned underneath the letters. However, in most cases, printed Hebrew omits the diacritic marks and includes only the letters, resulting in a highly ambiguous text, in which any given non-diacritized word can represent a host of different Hebrew words, each with a different meaning and pronunciation. For example, the form **בצל** can be diacritized as **בְּצֵל** (noun, “onion”), **בְּצֵל** (prefix+noun, “in a shadow”), **בְּצֵל** (prefix+definitive+noun, “in the shadow”) and others. The task of diacritization is thus a task of disambiguation: choosing from among the valid word possibilities for each non-diacritized word, and then adding in the diacritic marks accordingly. The multiple possibilities for

diacritizing any given word often represent different morphological possibilities. Thus, to an extent, choosing the correct diacritization entails morphological disambiguation; conversely, prior morphological disambiguation greatly reduces the total possible diacritization possibilities. We provide further details in §2.

**Hybrid Neural and Rule-based Approach** Our approach, described in §3, uses several bi-LSTM-based deep-learning modules for disambiguating the correct diacritization in context. However, it is also supplemented by comprehensive inflection tables and lexicons, when appropriate.

**Web Interface** We provide a web interface for the user to input a text for diacritization and refine the resulting diacritized text (Figure 1). Our system parses the text and automatically adds diacritics throughout. Afterward, the user can proofread the text in the interface. For each word, all alternate diacritization possibilities are provided for immediate selection, ordered according to their predicted probability. Keyboard shortcuts allow efficient navigation of the text and fast selection of alternate options. Users can choose to see morphological analyses for each of the diacritization options, to assist in distinguishing between options.

**Diacritics in Scientific Editions** We aim to provide a tool that is useful to casual users and language enthusiasts, but also to experts and professionals who may use it to set scientific editions of historical Hebrew texts. This latter requirement poses several challenges: handling of editorial sigla interspersed within the words; flexible handling of matres lectionis (letters which function as semi-vowels); and dealing with the orthography of medieval Hebrew, which often diverges widely from that of Modern Hebrew. Our tool meets scholarly requirements on all these fronts, as detailed in §8.



Of course, a prerequisite for an effective machine-learned system is high-quality training data. Our system is trained on a collection of 1,5M diacritized tokens which we annotated in-house.

## 4 High-quality Data Sources

We make use of the following language resources and corpora, which we collected.

**Language Resources** Our main resource is a high-coverage and accurate lexicon of Hebrew word forms, their diacritization and their corresponding morphological analyses. Employing a staff of language experts, we began by assembling a list of all nouns, adjectives and verbal roots in the Hebrew language. This list includes 50K lexemes altogether (10K roots, 30,5K nouns, and 9,5K adjectives). We then built comprehensive inflection tables to generate all possible inflected forms from each of these lexemes, including all valid combinations of possessive and accusative suffixes, with full diacritization. Altogether, this process generated some 5,5 million inflected forms (3,8M verbal forms; 1,3M nominal forms; and 460K adjectival forms). We also added 1,7K adverbs, and another 4,5K function words (conjunctions, prepositions, existentials, quantifiers, etc., including all possible suffix combinations). Finally, we collected a set of 17,5K frequent proper nouns (countries and major cities; heads of state and other notable people; and frequently-mentioned companies and organizations), and our language experts diacritized these as well. These tables suffice for modern Hebrew; however, in historical Hebrew texts, we often find Aramaic terms interspersed within the Hebrew. Therefore, we also built a similarly comprehensive and diacritized wordlist for Babylonian Aramaic. Our Aramaic wordlist contains 750K verbal inflected forms; 200K nominals; 1,5K adjectives; and another 2K adverbs and function words. We additionally assembled an exhaustive list of non-diacritized Hebrew names of persons and locations (including collections of both street names and city names).

**Annotated Corpora** For morphological tagging, we make use of a corpus of 200K tokens of modern Hebrew, composed of Hebrew fiction, news, wikipedia, and blogs. These tokens were manually annotated with fine-grained morphological information according to the scheme of (Elhadad et al., 2005). Additionally, as noted, we anno-

tated a 1,5M word diacritized modern Hebrew corpus, consisting of Hebrew prose (both fiction and non-fiction), newspapers (both news and op-ed), wikipedia, blogs (including many female-dominant blogs, to ensure coverage of feminine word forms), law protocols, Parliament proceedings, TV transcripts, academic texts, and biographical sketches. We have similarly collected and annotated corpora of historical Hebrew, consisting of Jewish legal writings and commentaries from the 3rd-12th centuries: 110K words with fine-grained morphological tagging, and 2M words with diacritization. Finally, regarding poetic Hebrew, we collected and annotated a corpus of 1,3M words, containing Hebrew poetry from both medieval and modern periods.

The undiacritized base texts were collected largely through partnerships with cooperating organizations in Israel; the morphological tagging and diacritization was done primarily in-house by our Hebrew language experts.

## 5 System Architecture

On a high level, our system works in the following stages, which we will elaborate on below. Each stage combines engineered linguistic information and a trained neural model.

1. POS-tagging and morphological disambiguation.
2. Filtering the possible diacritization analyses based on high coverage accurate tables and the output of stage (1).
3. Ranking the possible diacritizations for each word, in context.

**Part-of-speech tagging and morphological disambiguation** As diacritic marks closely interact with the morphological analysis and part-of-speech (POS) of the token, we first perform POS-tagging and morphological disambiguation, using a two-stage process. In the first stage, each word is assigned its core part-of-speech, and in the second stage it is enriched with additional morphological properties, where the set of considered morphological properties is determined based on the coarse-grained POS (e.g., nouns take gender, number and definiteness, while verbs do not take definiteness but do take tense and person).<sup>1</sup>

<sup>1</sup>We consider the following POS-tags: *Adj, Adv, Conj, At-Prep, Neg, Noun, Num, Prep, Pron, ProperNoun, Verb*,

Training is performed on our annotated corpus of 200K tokens. The resulting tagger has an accuracy of 92% for the coarse-grained part-of-speech, and 79% for full morphological disambiguation.<sup>2</sup>

Both taggers are 2-layer bi-LSTM transducers (Goldberg, 2017), where the first stage coarse-grained tagger maps each token  $w_i$  to a coarse POS-tag  $t_i$ , while the second stage morphological tagger adds additional morphological properties  $m_i^1, \dots, m_i^k$ . Each bi-LSTM takes as inputs vectors  $x_1, \dots, x_n$  corresponding to tokens  $w_1, \dots, w_n$  and produces vectors  $h(x_1), \dots, h(x_n)$ . These vectors are then fed into multi-layer perceptrons (MLP) for predicting the POS-tags and morphological properties, where each property is predicted by a different MLP:

$$t_i = \arg \max_j \text{softmax}(MLP_{\text{pos}}(h(x_i)))_{[j]}$$

$$m_i^k = \arg \max_j \text{softmax}(MLP_{m_k}(h(x_i)))_{[j]}$$

The set of MLPs  $m_i^k$  for a word is determined based on its predicted coarse-grained POS-tag.

In the coarse-grained tagger, each token  $w_i$  is mapped to an input vector  $x_i$  which encodes character level information, distributional word-level information, possible morphological analyses of  $w_i$ ,<sup>3</sup> and lexicon-based features of  $w_i$ . Specifically,  $x_i$  is a concatenation of: (a) for a word  $w_i$  made of characters  $c_1^{w_i}, \dots, c_m^{w_i}$  the sum of bi-LSTM states  $\sum_j h(c_j^{w_i})$  from a char-level bi-LSTM that runs over the entire sentence; (b) bi-LSTM state at  $w_i$ , for a word-level bi-LSTM that runs on pre-trained word2vec vectors for all of the words in the sentence; (c) a vector representing the possible fine-grained morphological analyses for the word,<sup>4</sup> according to our wide-coverage lexicon; (d) bits

*Interrogative, Interj, Quantifier, Existential, Modal, Prefix, Participle, Copula, Titular, Shel.Prep*, and the following morphological properties: *Gender, Number, Person, Construct/Absolute, Suffix (possessive / accusative / pronominal)*.

<sup>2</sup>While these numbers may seem low, we note that they are (a) on-par with other Hebrew systems (Adler and Elhadad, 2006; More and Tsarfaty, 2016) and (b) are only intended to support the diacritization process, where we find they do well.

<sup>3</sup>We find that providing the coarse-grained tagger with information about possible fine-grained analyses of neighbouring words helps to disambiguate cases where a given word can be resolved as more than one POS. For instance, a given word may be resolvable as a noun or adjective; however, if the adjective possibility involves a feminine conjugation, and the preceding noun is a masculine noun, then the probability of the adjectival POS is severely reduced.

<sup>4</sup>We assign trainable embeddings of 3-5 dimensions to each morphological category (gender, number, person, etc.), and we concatenate these together to form the input vector.

indicating whether  $w_i$  is in our comprehensive list of proper-nouns (names of streets, cities and people), and whether it is in our wide-coverage lexicon at all (the latter is used to mark rare and unknown words). In the fine-grained tagger,  $x_i$  is a concatenation of vector (b) above and: for a word  $w_i$  where the predicted POS tag is  $t_i$ , and the possible fine-grained morphological analyses for  $w_i$  limited by  $t_i$  is represented by  $m_i$ , the bi-LSTM state for a bi-LSTM that runs on the concatenation of  $(t_i; m_i)$ . Significantly, note that in the fine-grained tagger,  $x_i$  does not include the information of the word form on the character-level. We find this to be more accurate, because it removes bias in cases where a specific character form happens to appear in the training corpus in only one configuration. This is particularly relevant regarding verbs which can be resolved as either a masculine or a feminine verb, each with a distinct diacritization. In many cases, the training corpus contains the verb only in one stereotypical gender configuration. By hiding the character-level information, we force the system to make a more logical morphological determination, because it is not able to mechanically set the feature equal to what was seen in the training corpus.

**Constraints** The tagger predictions are constrained by a wide-coverage lexicon that maps word forms to their possible morphological analyses. When a word is not in the lexicon, we allow all POS-tags for the word. We also apply additional filters to rule out POS-tags for words that participate in a hand-crafted list of about 10K word collocations, and in all of their possible inflected forms (e.g., in the context of the tokens (בית מרקחה) *byt mrkht*, the word בית *byt* should not be tagged as the absolute form בַּיִת *bayit*, but rather as the construct form בֵּית *beyt*. And thus too for the plural inflection of the same collocation - מרקהת בתי *bty mrkht*, the word בתי *bty* should not be tagged as בֵּיתֵי *byty* (feminine noun with possessive suffix), but rather as the plural-construct form בֵּיתֵי *batey*).

**Filtering** For each word  $w_i$  in the text, we retrieve from our wordlists (see §4) a set of possible diacritizations  $D_i = d_1^i, \dots, d_\ell^i$  and their corresponding morphological analyses. This set is then further refined by intersecting it with the predicted morphological analysis for the word. Words that are not in our list get an empty set, indicating that their diacritization is not constrained. This stage leaves us with an average of 1.2 diacritic sequences



for each known word. If we were to perform random selection from this list, we would achieve 87.1% exact-match word-level diacritization accuracy on our Modern Hebrew test corpus.

**Diacritization Ranking** Finally, we run an LSTM-based diacritization module to rank the possible diacritization sequences from the previous stage, and to assign diacritics to unknown words.

The LSTM-based module assigns a diacritic mark for each character in the sequence.<sup>5</sup> The diacritics for each word  $w_i$  are predicted separately, using beam-search over the predictions of the diacritic for each letter with the word, to ensure word-level consistency. For known words, the beam-search is constrained to valid diacritic predictions from the set  $D_i$ , while for unknown words it is unconstrained. Note that when predicting the diacritics for a letter  $c_j^{w_i}$  in token  $w_i$  the model is aware of the other diacritic assignments in that word, but not of diacritic assignments for the other words of the sentence. However, the model *is* context-aware, as it considers the character-level and word-level information from the entire sentence via a sentence-level bi-LSTM layer.

To be more precise, each letter  $c_j^{w_i}$  is mapped to a vector  $h'(c_j^{w_i})$  which is a concatenation of the followings two items: (a) bi-LSTM state at  $c_j^{w_i}$  for a char-level bi-LSTM that runs over the entire sentence; (b) bi-LSTM state at  $w_i$  for a word-level bi-LSTM that runs on the pre-trained word2vec vectors for all words in the sentence. Then, for a given word  $w_i$  we have a list of vectors representing each letter  $h'(c_1^{w_i}) \dots h'(c_m^{w_i})$ . We then predict the diacritization sequence as follows. If this is a known word, then we have a list of  $k$  possible diacritization sequences, and we choose the one with the highest score:

$$s = \arg \max_k \text{score}(c_{1:m}^{w_i}, t_{1:m}^k)$$

where  $t_{1:m}^k$  is the  $k$ th diacritic sequence, and  $\text{score}(c_{1:m}^{w_i}, t_{1:m}^k)$  is calculated as:

$$\sum_{j=1}^m \text{MLP}(h'(c_j^{w_i}); \text{LSTM}(t_{0:j-1}^k))_{[t_j]}$$

For unknown words, we run beam-search with  $k = 8$  to predict the  $k$  most likely diacritization sequences, and we choose the top beam-ray.

<sup>5</sup>Combinations of gemination with an additional diacritic mark are considered distinct diacritic symbols for prediction. An independent MLP predicts the position of the upper dot for the 'shin' character.

|               | Letter Accuracy | Word Accuracy |
|---------------|-----------------|---------------|
| <b>Dicta</b>  | <b>95.12%</b>   | <b>88.23%</b> |
| <b>Morfix</b> | 90.32%          | 80.9%         |
| <b>Snopi</b>  | 78.96%          | 66.41%        |

Table 1: Accuracy on Modern Hebrew Test Corpus

## 6 Evaluation

We evaluate the system quantitatively against two commercial Hebrew diacritization systems, Morfix<sup>6</sup> and Snopi<sup>7</sup>, considered state-of-the-art.

We also provide qualitative evaluation, demonstrating the ability to diacritize unknown words, and to produce context-sensitive diacritization.

**Quantitative Evaluation** We use two quantitative measures to evaluate our model. (1) Word-level accuracy: for a given word<sup>8</sup>, we consider the prediction correct if and only if all the diacritic marks on the word are correct, including gemination and the 'shin' dot, with all matres lectionis removed. (2) Character-level accuracy: For each Hebrew letter in the input text we check if the model predicted the correct set of diacritic marks for the letter (and, for matres lectionis, we check that the model predicted their removal).

We evaluated the system on a 6,000-word unseen gold-test corpus, manually diacritized by a professional linguist (Table 1). The corpus consists of a random selection of Hebrew wiki articles. We have made the test corpus publicly available.<sup>9</sup>

**Qualitative Evaluation** For the qualitative evaluation, we demonstrate that the system knows how to handle diacritization for unknown words, and this, in a context-sensitive manner. For this example we choose an invalid word which conforms to Hebrew letter patterns but which does not actually exist in modern Hebrew: סרדינות. No such word exists in Hebrew dictionaries, nor in our wordlist. We put the word into a sentence in two contexts - in the first, it fills the role of an adverb, and in the second, it fills the role of a noun. Hebrew diacritization norms would dictate two different diacritizations for these two usages: for the adverb, the final vowel should be 'u', while for the noun, it should be 'o'. Our system handles both correctly (Figure 2).

<sup>6</sup><https://nakdan.morfix.co.il/>

<sup>7</sup><http://www.nakdan.com/>

<sup>8</sup>For this calculation, punctuation and non-Hebrew words or symbols are ignored.

<sup>9</sup>The test corpus can be downloaded at this link: <http://tiny.cc/hebrew-test-git>

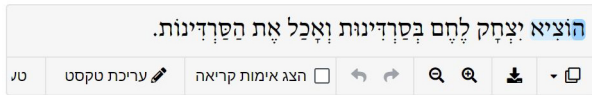

Figure 2: Diacritization of the fictional word סרדינות in two different contexts, with two different prefixes; the word is diacritized as expected in both contexts.

|               | Letter Accuracy | Word Accuracy |
|---------------|-----------------|---------------|
| <b>Dicta</b>  | <b>94.94%</b>   | <b>87.94%</b> |
| <b>Morfix</b> | 80.25%          | 68.1%         |
| <b>Snopi</b>  | 72.53%          | 58.39%        |

Table 2: Accuracy on Rabbinic Hebrew Test Corpus

## 7 Additional Text Genres

In addition to modern Hebrew, we also support Rabbinic Hebrew and poetic Hebrew. These genres require specialized handling. Firstly, we cannot use our modern Hebrew morphology model, because the morphological and syntactic norms of these genres differ from those of modern Hebrew. Secondly, we cannot use our modern Hebrew wordlist filters. There is no standardized orthography for Rabbinic Hebrew, nor for medieval poetic Hebrew. Additionally, poets often specifically choose less common words in order to meet prosodic constraints; thus, our rare-word filters are not relevant. Finally, many words which would be considered invalid in modern Hebrew are found within these other genres. Rabbinic Hebrew includes many Aramaic words, as well as Hebrew words with Aramaic prefixes. Poetic Hebrew includes oddities such as past-tense verbs with temporal prefixes.

For Rabbinic Hebrew, we train a specialized morphology model based on our tagged historical Hebrew corpus. For poetry, where morphological sequences are less constrained and less predictable, we skip the morphology layer and diacritize the text directly based on the diacritization LSTM.

In order to test our performance, we created test corpora for each of the genres. The poetry test corpus includes a set of liturgical poems of the 'yotzer' genre, transcribed from Cairo Genizah manuscripts.<sup>10</sup> The Rabbinic Hebrew test corpus is taken from the 'Bet Yosef', a 16th century commentary on Jewish law.<sup>11</sup> In Tables 2 and 3 we display our quantitative results on these two corpora.

<sup>10</sup>Full data on these texts is available here: <http://weekdayyotzrot.com>

<sup>11</sup>Both test corpora are available for download here: <http://tiny.cc/hebrew-test-git>

|               | Letter Accuracy | Word Accuracy |
|---------------|-----------------|---------------|
| <b>Dicta</b>  | <b>85.76%</b>   | <b>70.23%</b> |
| <b>Morfix</b> | 80.9%           | 65.3%         |
| <b>Snopi</b>  | 69.24%          | 52%           |

Table 3: Accuracy on Poetic Hebrew Test Corpus

## 8 Advanced Features

- 1. Scientific Editions:** In scientific editions, editorial sigla are interspersed throughout the text. For instance, letters which are rubbed out in the textual witnesses will be supplied within brackets (מר[ר]ש). Existing diacritization tools fail here because they parse such sigla as word separators. Secondly, normative Hebrew diacritization entails the omission of matres lectionis, and indeed existing tools omit these letters when returning the diacritized text. However, in scientific editions, matres lectionis must be maintained in order to represent the manuscript evidence. Finally, the orthography of medieval Hebrew manuscripts can diverge wildly from modern norms; for example, we often find a yod inserted after the initial letter of a hitpael construction (e.g. היתהלבש), a phenomenon which would never occur in a modern Hebrew text. Our tool meets all of these needs, and allows the user to either remove or maintain matres lectionis.
- 2. The web interface automatically highlights Biblical quotes within the Hebrew text.** Biblical phrases are often incorporated into Hebrew texts, whether as explicit prooftexts or as rhetorical flourishes. We automatically identify such quotes, diacritize them according to the canonized diacritization of the Hebrew Bible, and display them in the distinctive Koren font (a font well-known for its use in modern Hebrew Bibles). See figure 3 for an example.

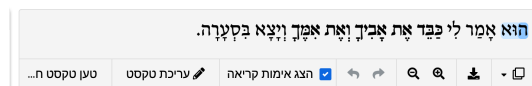

Figure 3: Integrated Biblical quote marked with font.

## 9 Conclusion

We are pleased to release our Hebrew diacritization system for free unrestricted use. It is powered by a combination of advanced machine learning and manually curated linguistic resources, and thus succeeds in setting a new state of the art for Hebrew diacritization. We have released also our diacritized test corpora for benchmarking.

## References

- Gheith Abandah, Alex Graves, Balkees Al-Shagoor, Alaa Arabiyat, Fuad Jamour, and Majid Al-Taee. 2015. [Automatic diacritization of arabic text using recurrent neural networks](#). *International Journal on Document Analysis and Recognition (IJ DAR)*, 18:183–197.
- Meni Adler and Michael Elhadad. 2006. [An unsupervised morpheme-based HMM for hebrew morphological disambiguation](#). In *ACL 2006, 21st International Conference on Computational Linguistics and 44th Annual Meeting of the Association for Computational Linguistics, Proceedings of the Conference, Sydney, Australia, 17-21 July 2006*.
- Yonatan Belinkov and James R. Glass. 2015. Arabic diacritization with recurrent neural networks. In *EMNLP*.
- Yaacov Choueka and Yoni Neeman. 1995. Nakdan-text,(an in-context text-vocalizer for modern hebrew). In *BISFAI-95, The Fifth Bar Ilan Symposium for Artificial Intelligence*.
- Michael Elhadad, Yael Netzer, David Gabay, and Meni Adler. 2005. Hebrew morphological tagging guidelines. Technical report, Technical report, Ben-Gurion University, Dept. of Computer Science.
- Ya'akov Gal. 2002. An hmm approach to vowel restoration in arabic and hebrew. In *Proceedings of the ACL-02 workshop on Computational approaches to semitic languages*, pages 1–7. Association for Computational Linguistics.
- Yoav Goldberg. 2017. Neural network methods for natural language processing. *Synthesis Lectures on Human Language Technologies*, 10(1):1–309.
- Amir More and Reut Tsarfaty. 2016. Data-driven morphological analysis and disambiguation for morphologically rich languages and universal dependencies. In *Proceedings of COLING 2016*.
- Hamdy Mubarak, Ahmed Abdelali, Hassan Sajjad, Younes Samih, and Kareem Darwish. 2019. [Highly effective Arabic diacritization using sequence to sequence modeling](#). In *Proceedings of the 2019 Conference of the North American Chapter of the Association for Computational Linguistics: Human Language Technologies, Volume 1 (Long and Short Papers)*, pages 2390–2395, Minneapolis, Minnesota. Association for Computational Linguistics.
- Mohsen Rashwan, Ahmad Sallab, Hazem Raafat, and Ahmed Rafea. 2015. [Deep learning framework with confused sub-set resolution architecture for automatic arabic diacritization](#). *IEEE Transactions on Audio Speech and Language Processing*, 23.
